# Supplementary material
Source: PubMed Central journal article supplement (PMC4507336)
Supplement: JB.00261-15_zjb999093694so1.pdf [file JB.00261-15_zjb999093694so1.pdf]

### CRISPR 30 spacer 1

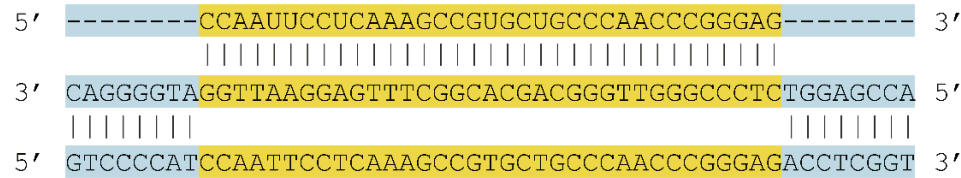

← CRISPR spacer RNA

← Protospacer Sequence

### CRISPR 30 spacer2

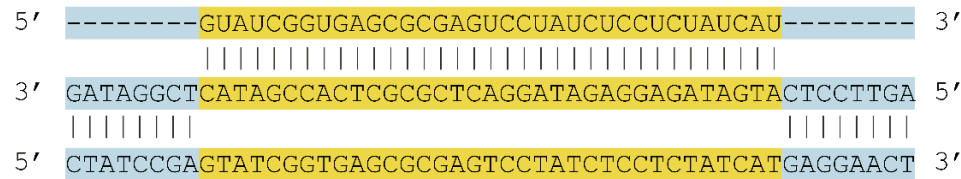

← CRISPR spacer RNA

← Protospacer Sequence

### CRISPR 30 spacer 23

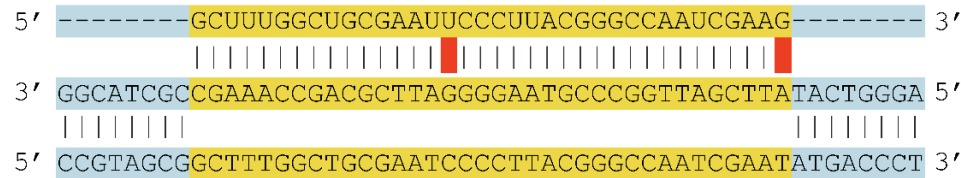

← CRISPR spacer RNA

← Protospacer Sequence

### CRISPR 37 spacer 1

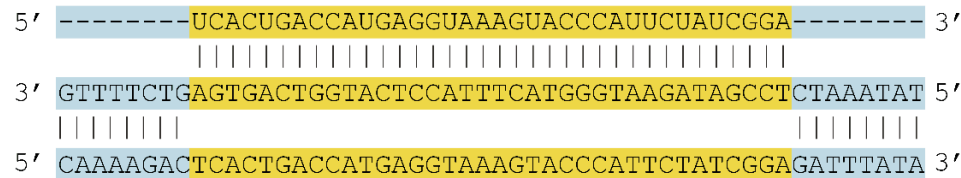

← CRISPR spacer RNA

← Protospacer Sequence

1

2 **Supplementary figure 1s. The CRISPRTarget analysis of self-targeting spacers found in CRISPR 30 and CRISPR 37 arrays in *P. gingivalis*.** None of  
 3 protospacers recognized by the self-targeting spacers possess proper PAM motif (NGG at 3'end) required for interference in type I CRISPR-Cas  
 4 system. Due to that targeting its own genome by *P. gingivalis* CRISPR-Cas system is highly unlikely.
